# Supplementary material for: Wood-based self-supporting flexible electrode materials for energy storage applications
Source: Royal Society of Chemistry journal article supplement (doi:10.1039/d0ta12312a), 2021-01-01
Supplement: d0ta12312a1.pdf [file d0ta12312a1.pdf]

Supporting Information For

## Wood-based self-supporting Flexible Electrode Materials for Energy Storage Application

Linlin Liu<sup>1\*</sup>, zhen ji<sup>1</sup>, Shuyan Zhao<sup>2</sup>, Qingyuan Niu<sup>2</sup>, Songqi Hu<sup>1</sup>

*1 Science and Technology on Combustion, Internal Flow and Thermo-Structure  
Laboratory, Northwestern Polytechnical University, Xi'an 710072, P. R. China*

*2 School of Material and Chemical Engineering, Zhengzhou University of Light  
Industry, Zhengzhou 450002, P. R. China*

\* Corresponding author.

E-mail: [lll@nwpu.edu.cn](mailto:lll@nwpu.edu.cn)

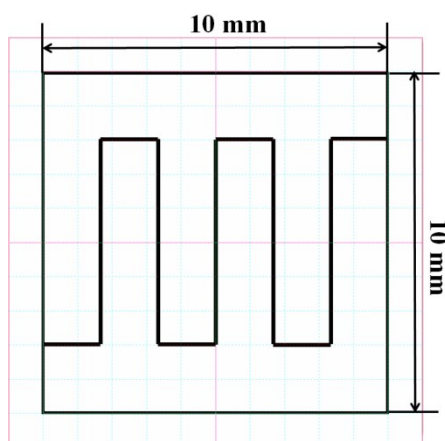

Fig. S1 The cutting path of CO<sub>2</sub> laser.

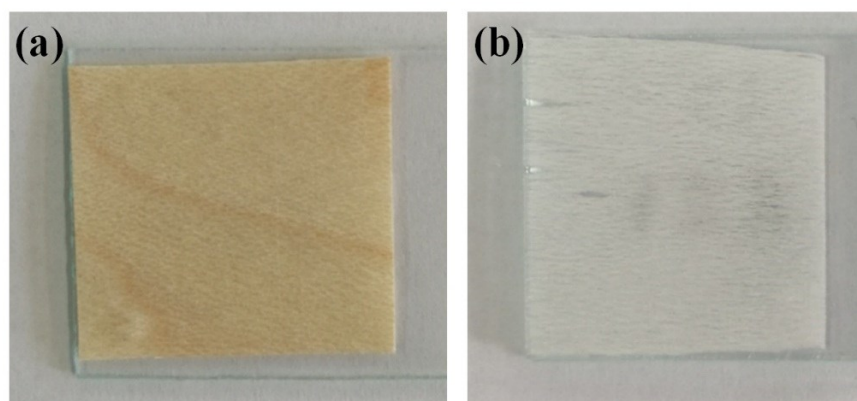

Fig. S2 Poplar wood slice (a) and the delignified poplar wood slice (b).

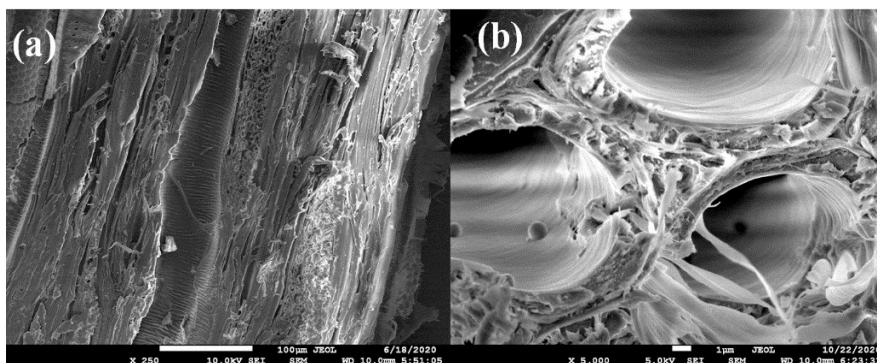

Fig. S3 SEM of the poplar wood slice: parallel to the growth direction (a) and perpendicular to the growth direction (b).

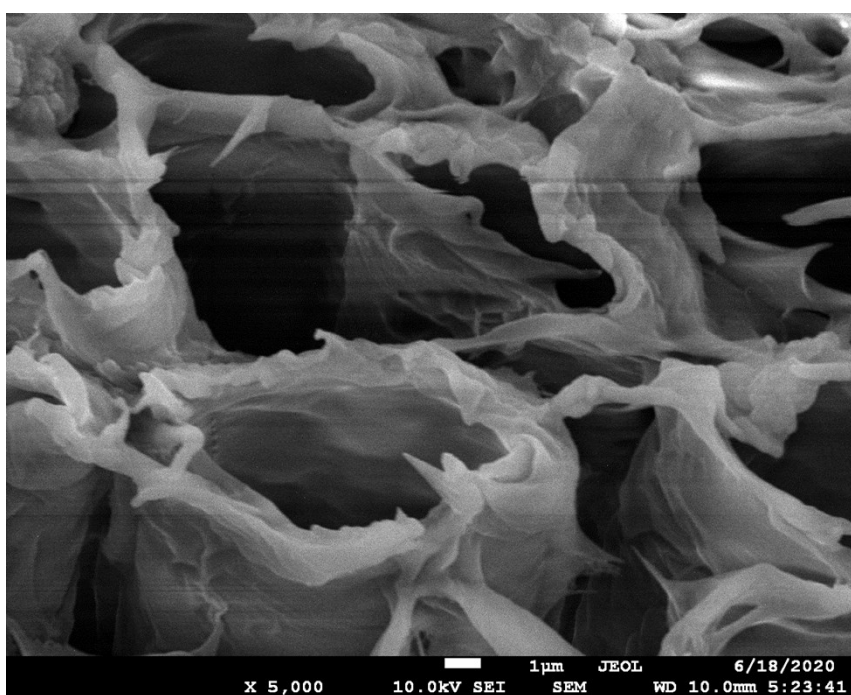

Fig. S4 SEM of the delignified poplar wood slice.

**Table S1** Removal percentage of poplar wood.

|                                  | 1 #    | 2#     | 3#      | 4#     |
|----------------------------------|--------|--------|---------|--------|
| poplar wood (g)                  | 0.1752 | 0.1239 | 0.0985g | 0.3976 |
| Delignified poplar wood (g)      | 0.0798 | 0.0556 | 0.0371g | 0.1725 |
| Removal percentage of substances | 54%    | 55%    | 62%     | 56%    |

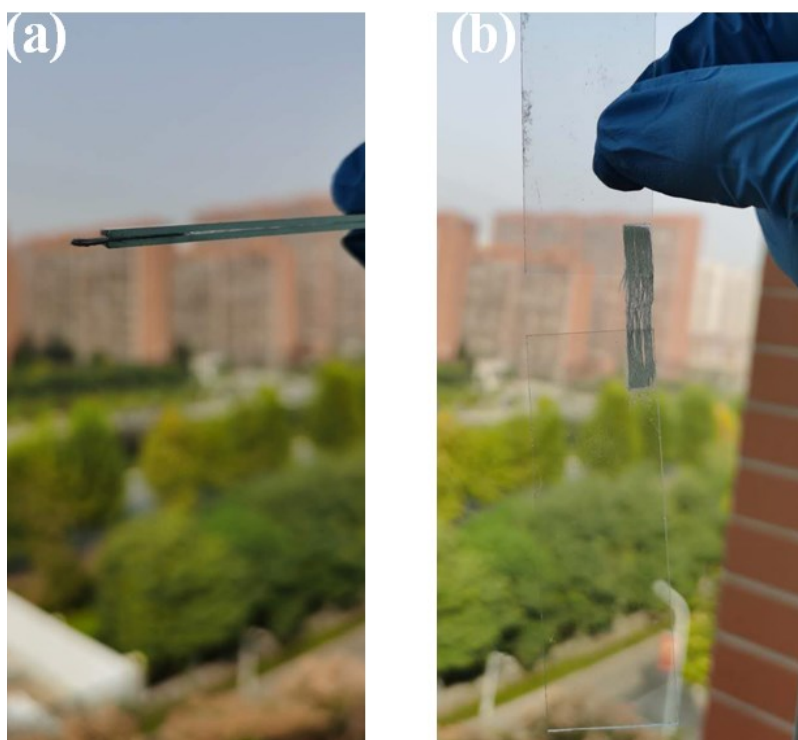

Fig. S5 Flexibility of the delignified poplar wood slice.

**Table S2** Thickness of the delignified wood-based carbon material at different carbonization temperature.

| Carbonization temperature (°C) | 600 | 800 | 1000 | 1200 |
|--------------------------------|-----|-----|------|------|
| Thickness ( $\mu\text{m}$ )    | 41  | 40  | 51   | 53   |

**Table S3** Carbon yield of the delignified wood-based carbon material at different carbonization temperature.

| Carbonization temperature (°C) | 600   | 800   | 1000  | 1200  |
|--------------------------------|-------|-------|-------|-------|
| Carbon yield (%)               | 23.18 | 22.12 | 19.73 | 18.62 |

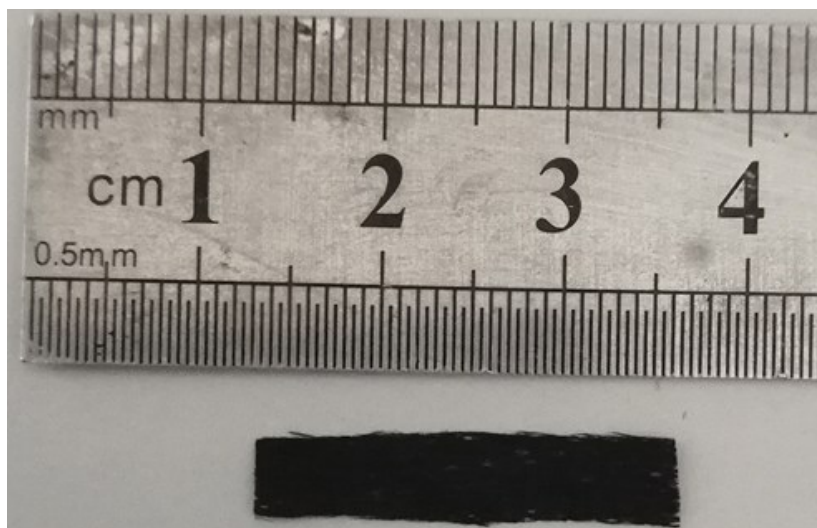

Fig. S6 The DWFC-800 flexible electrode material.

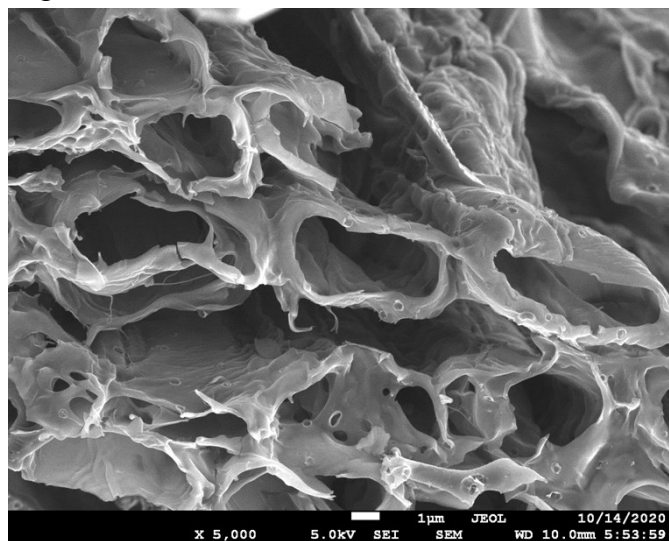

Fig. S7 SEM of the DWFC-800 flexible electrode material.

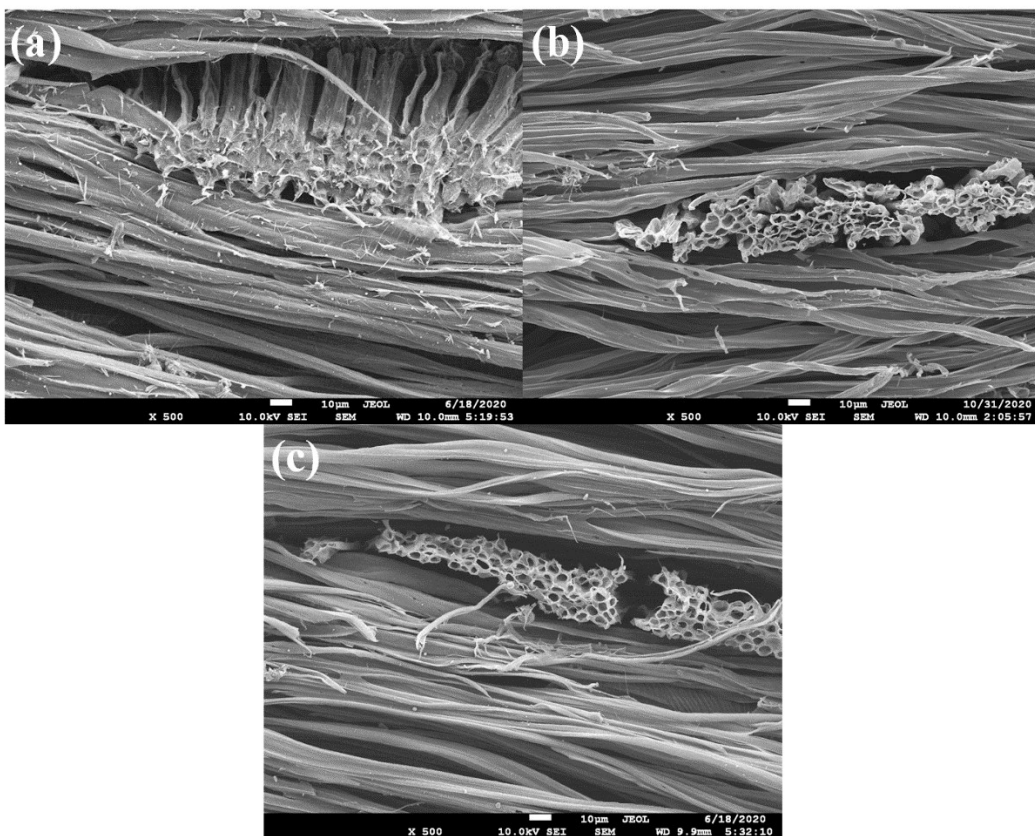

Fig. S8 SEM of the DWFC-600 (a), DWFC-1000 (b) and DWFC-1200 (c) flexible electrode material.

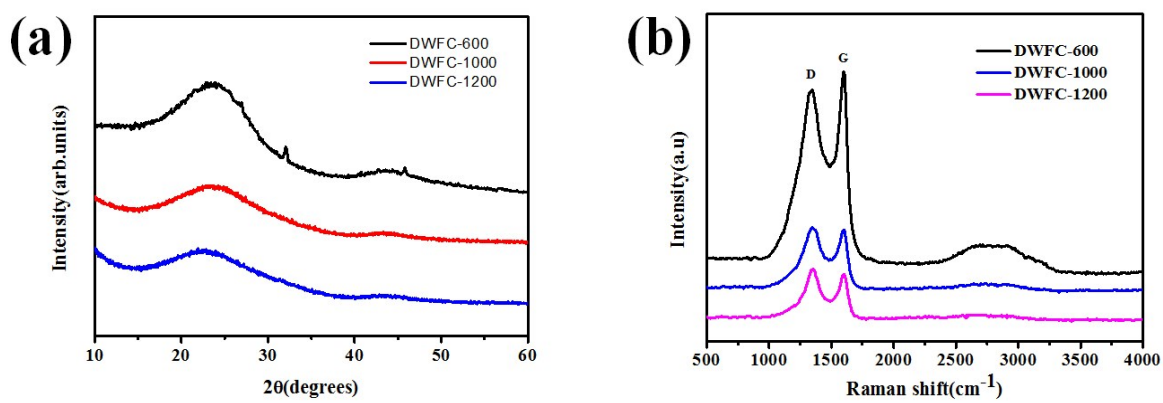

Fig. S9 The XRD pattern (a) and Raman spectrum (b) of the DWFC-600, DWFC-1000 and DWFC-1200 flexible electrode material.

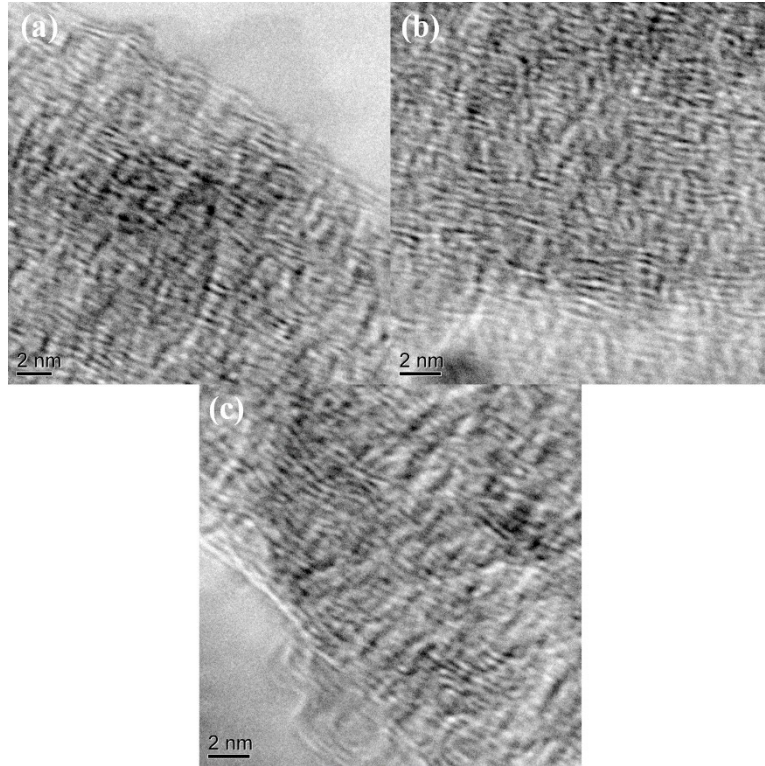

Fig. S10 TEM of the DWFC-600 (a), DWFC-1000 (b) and DWFC-1200 (c) flexible electrode material.

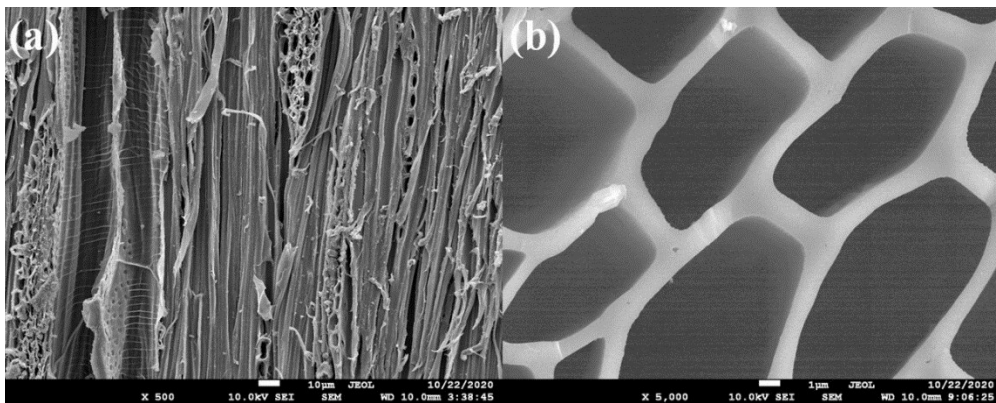

Fig. S11 SEM of the undelignified wood-based carbon material.

The carbon yield of the undelignified wood-based carbon material is about 31% at 800 °C.

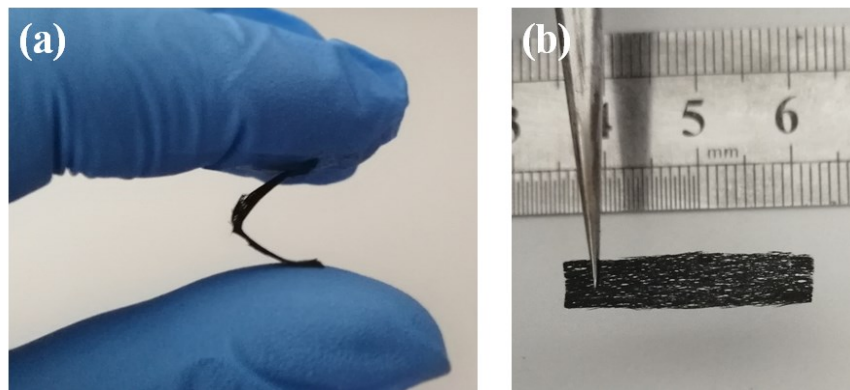

Fig. S12 Flexibility of the DWFC-800 flexible electrode material (a), the DWFC-800 flexible electrode material after bending (b).

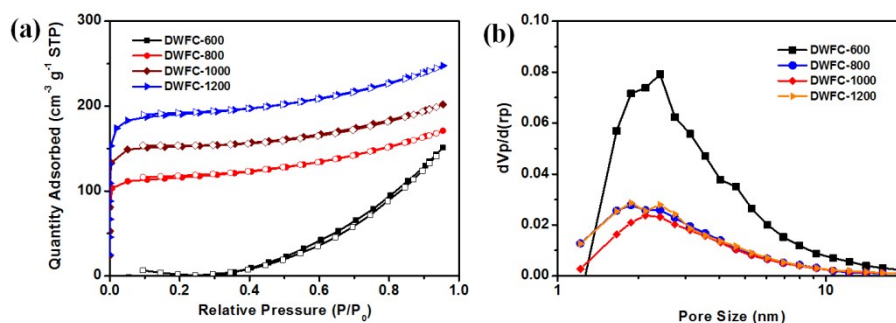

Fig. S13 Nitrogen adsorption/desorption isotherms (a) and BJH pore-size distribution (b) of the delignified wood-based carbon materials.

Table S4 The specific surface area of the DWFC-X carbon materials

| Sample                | DWFC-600 | DWFC-800 | DWFC-1000 | DWFC-1200 |
|-----------------------|----------|----------|-----------|-----------|
| $S_{BET}(m^2 g^{-1})$ | 37       | 460      | 615       | 756       |

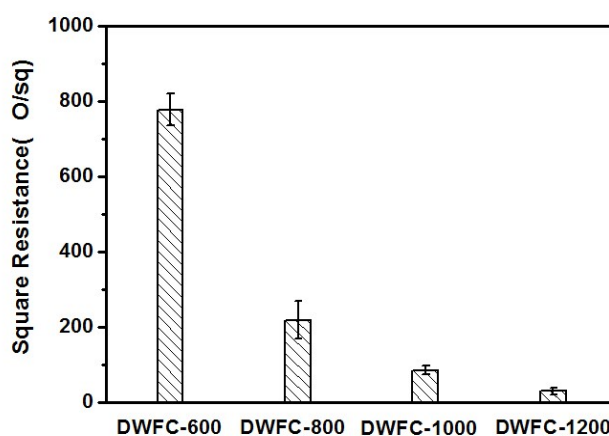

Fig. S14 The sheet resistance of the delignified wood-based carbon materials.

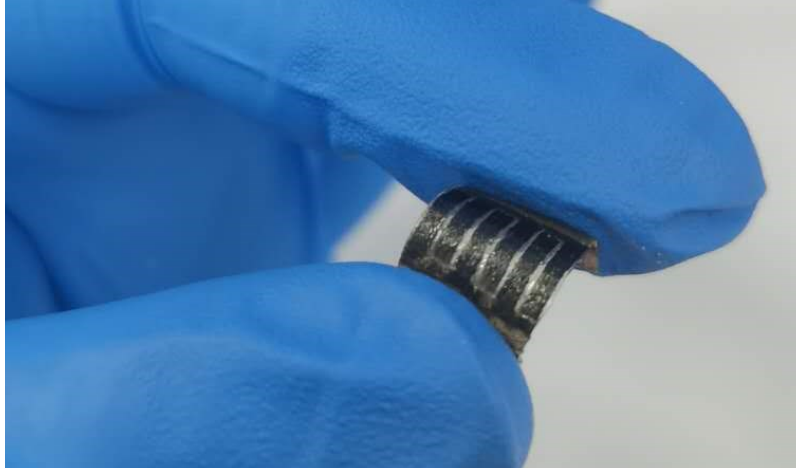

Fig. S15 The DWFC-800 based flexible self-supporting interdigitated solid supercapacitor.

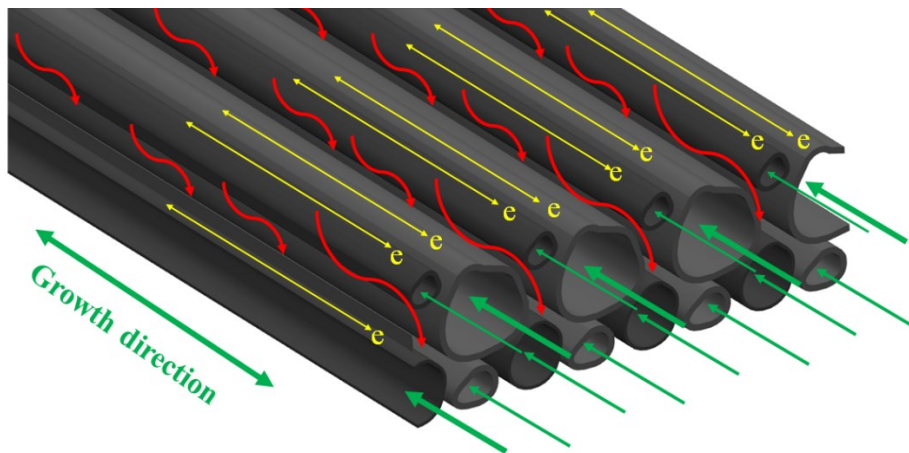

Fig. S16 Illustration of the penetration path for electrolyte and transmission path of electrons.

The electrolyte penetration path of the sandwich structure is mainly the schematic path of the red penetration. However, the electrolyte penetration path of the interdigitated structure is the schematic path of the red and green penetration. The transmission path of electrons is the yellow schematic path.



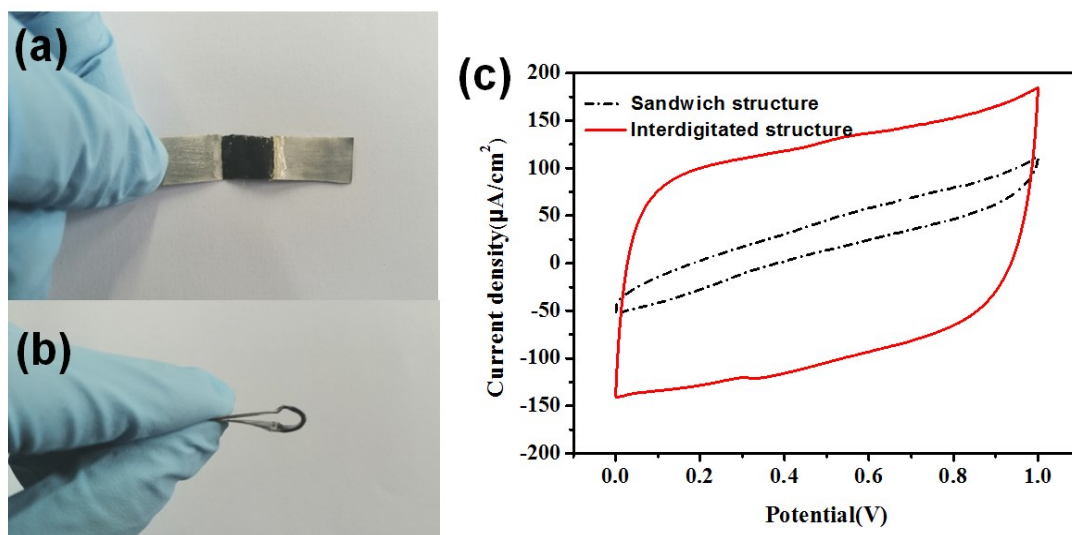

Fig. S17 The DWFC-800 based flexible solid supercapacitors with sandwich structure (a and b), the CV curves of the DWFC-800 based flexible self-supporting solid supercapacitors with sandwich structure and interdigitated structure at 5 mV/s (c).

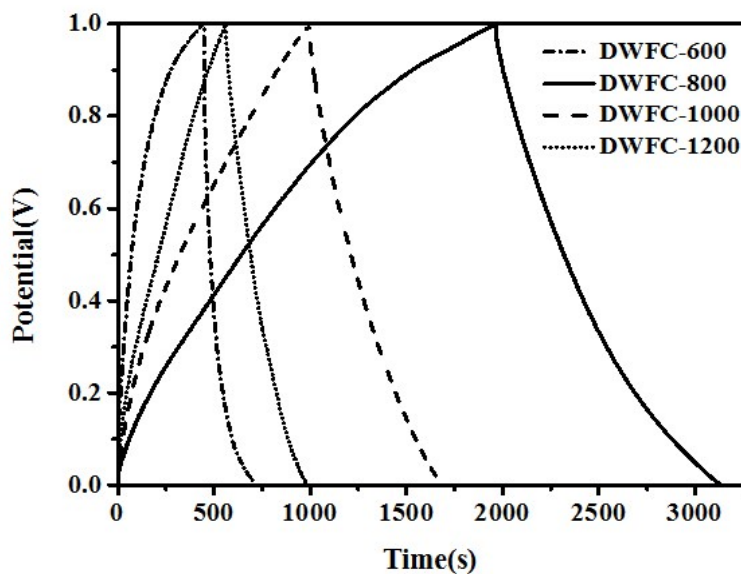

Fig. S18 The GCD curves of the DWFC-X based flexible self-supporting interdigital solid supercapacitor at a current density of  $20 \mu\text{A cm}^{-2}$ .

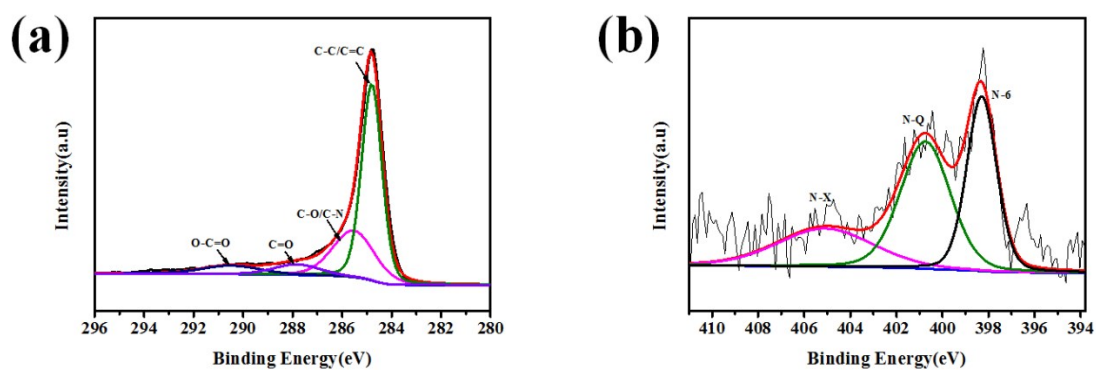

Fig. S19 High resolution C 1s and N 1s XPS spectra of the DWFC-800 flexible electrode material.

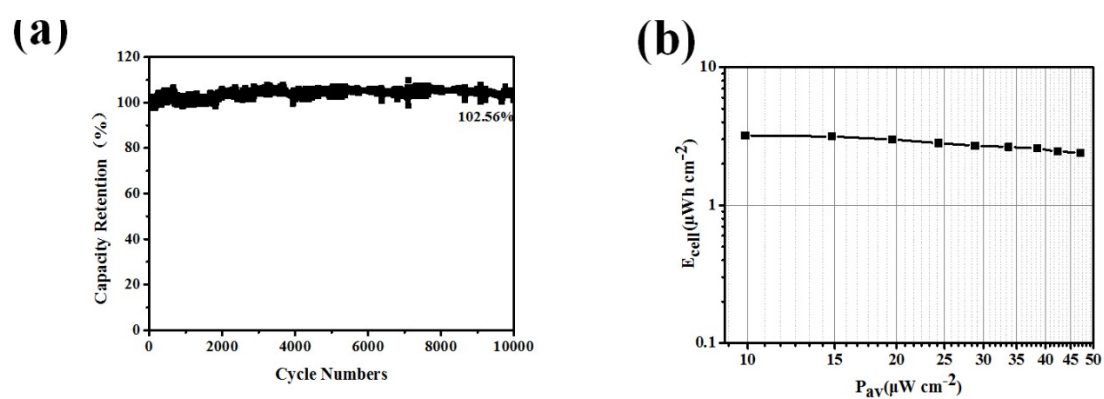

Fig. S20 Cycling stability of the DWFC-800 based flexible self-supporting interdigital solid supercapacitor at a current density of  $400 \mu\text{A cm}^{-2}$  up to 10 000 cycles (a); Ragone plot of the DWFC-800 based flexible self-supporting interdigital solid supercapacitor (b)

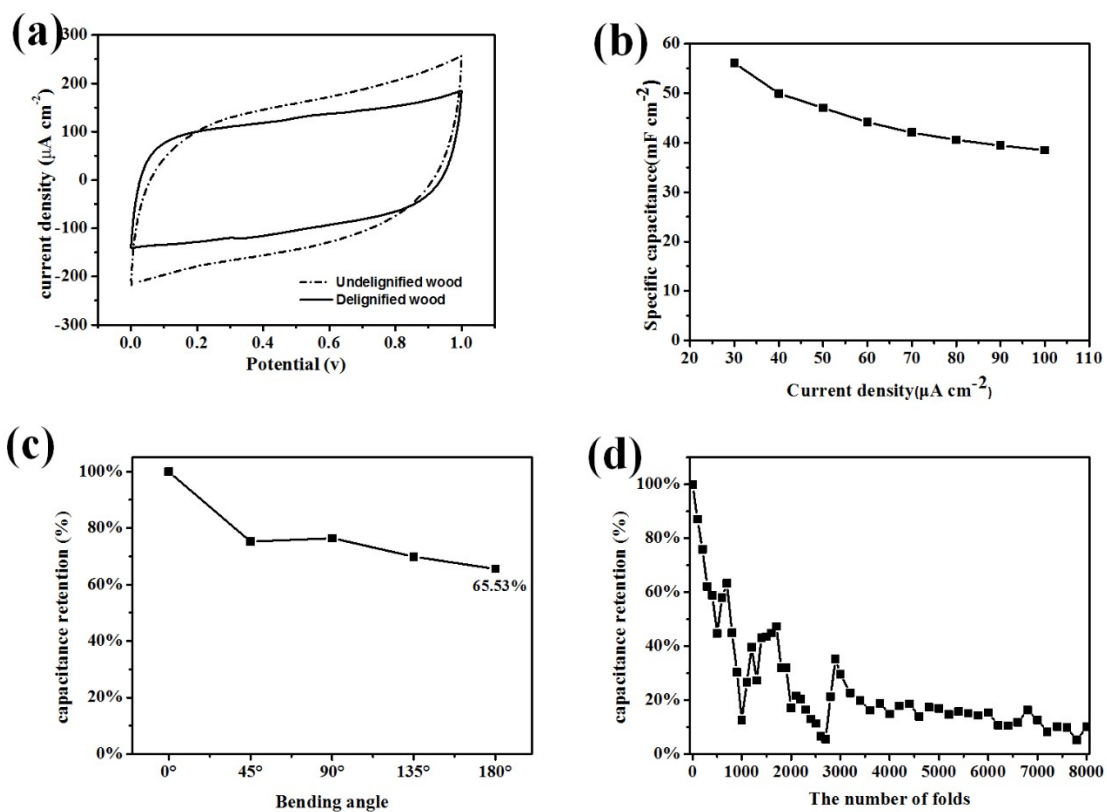

Fig. S21 The CV curves of the undelignified wood carbon-based interdigital solid supercapacitor and DWFC-800 based flexible self-supporting interdigital solid supercapacitor at 5 mV/s (a); the areal capacitance of the undelignified wood carbon-based interdigital solid supercapacitor at different current densities (b); the capacitance retention of the undelignified wood carbon-based interdigital solid supercapacitor at different bending angle (C); the capacitance retention of the undelignified wood carbon-based interdigital solid supercapacitor at different fold times.

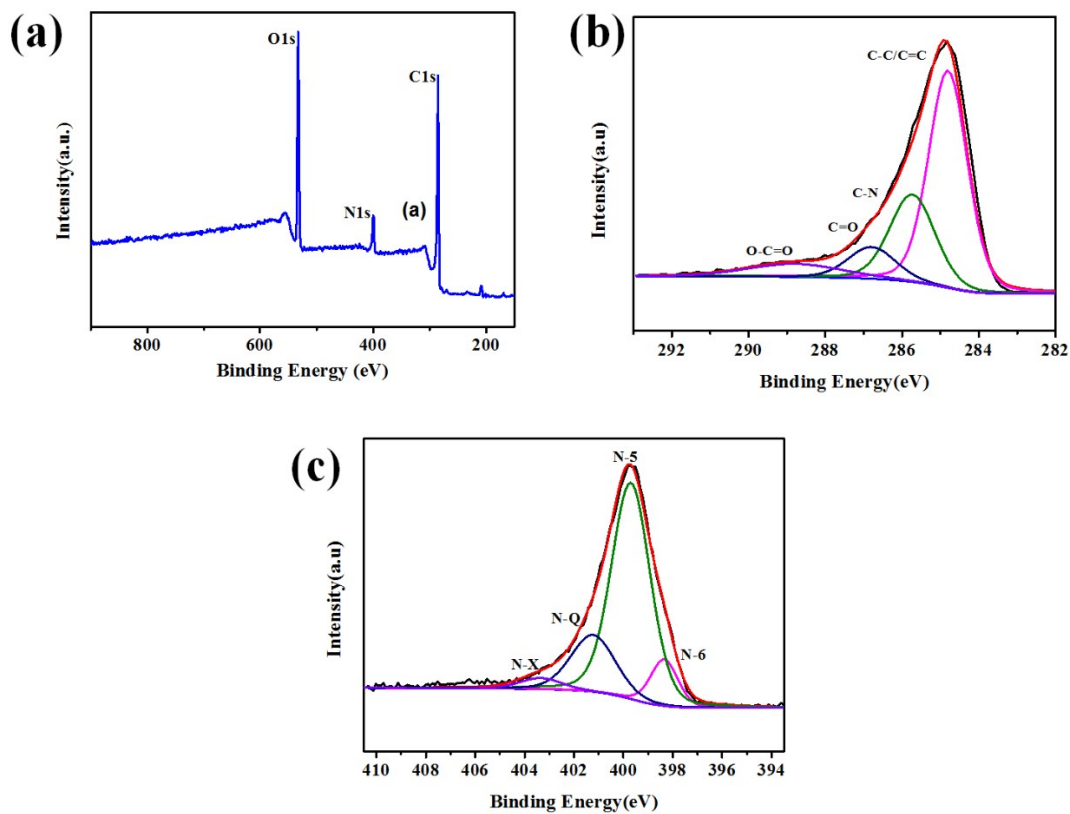

Fig. S22 XPS survey spectrum (a) and high-resolution XPS spectra of C 1s (b), N 1s (c) of the DWCPA-1.00 electrode material.

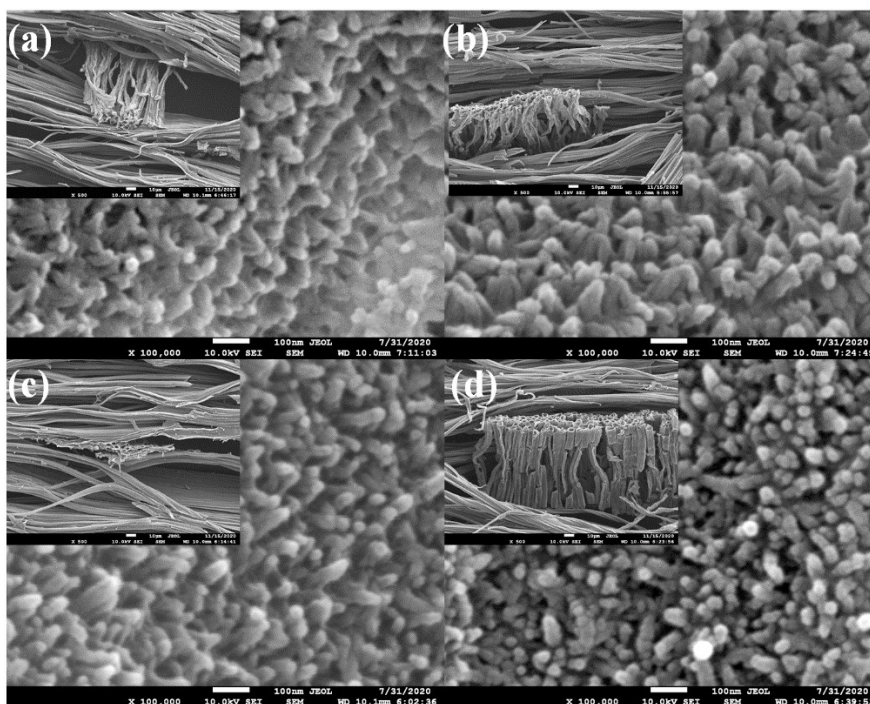

Fig. S23 SEM of the DWCPA-0.25, DWCPA-0.5, DWCPA-1 and DWCPA-2 electrode material.

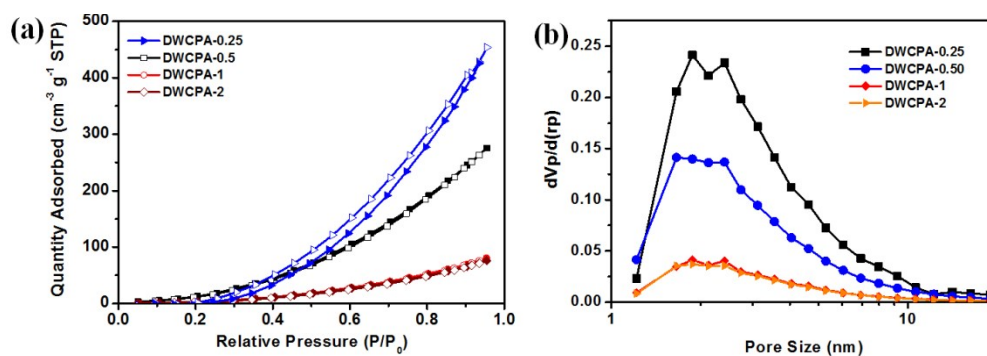

Fig. S24 Nitrogen adsorption/desorption isotherms (a) and BJH pore-size distribution (b) of the DWCPA-X composite materials.

Table S5 The specific surface area of the DWCPA-X carbon materials

| Sample                                     | DWCPA-0.25 | DWCPA-0.5 | DWCPA-1 | DWCPA-2 |
|--------------------------------------------|------------|-----------|---------|---------|
| $S_{\text{BET}}(\text{m}^2 \text{g}^{-1})$ | 168        | 140       | 35      | 34      |

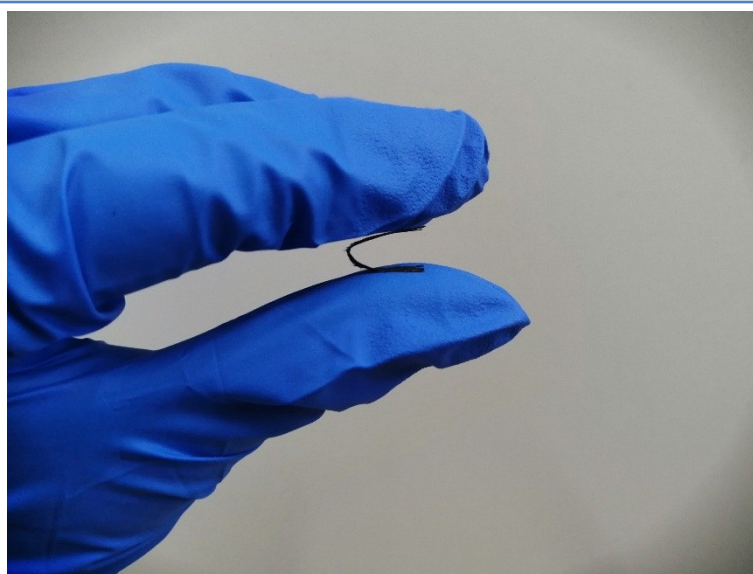

Fig. S25 The DWCPA-1 flexible electrode material.

Table S6 Thickness of the DWCPA-X flexible electrode material

| sample    | DWCPA-0.25       | DWCPA-0.5        | DWCPA-1          | DWCPA-2          |
|-----------|------------------|------------------|------------------|------------------|
| Thickness | 40 $\mu\text{m}$ | 44 $\mu\text{m}$ | 42 $\mu\text{m}$ | 38 $\mu\text{m}$ |

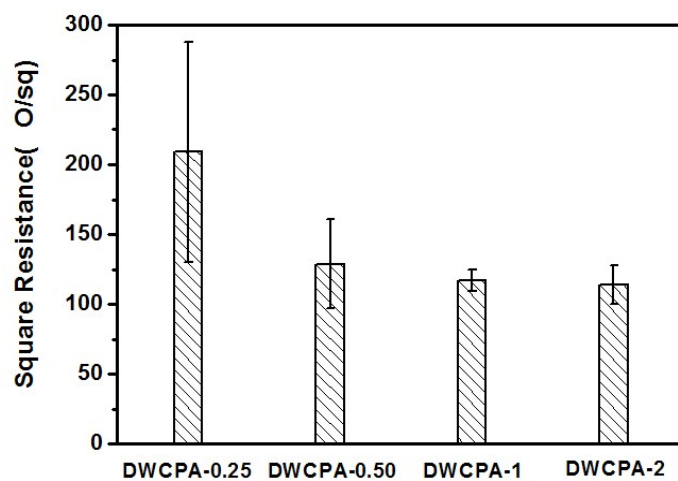

Fig. S26 The sheet resistance of the delignified wood-based carbon/polyaniline nanowire arrays composite materials.

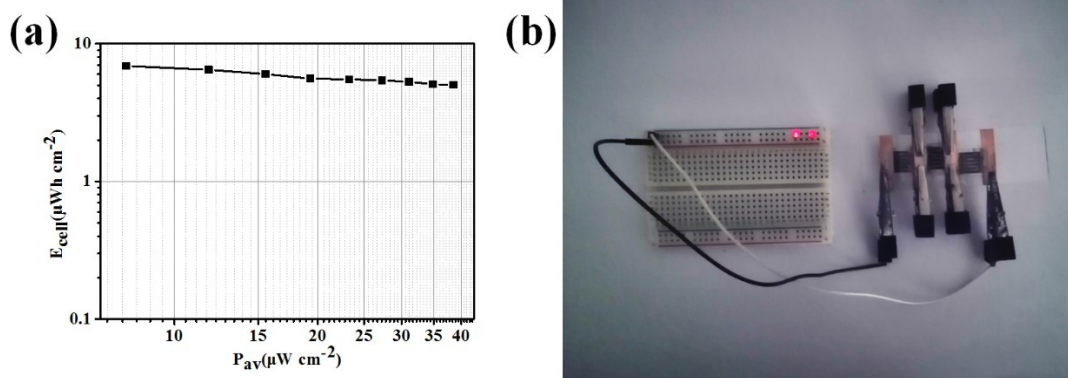

Fig. S27 Ragone plot of the DWCPA-1 based flexible self-supporting interdigital solid supercapacitor (a), Three DWCPA-1-based flexible self-supporting interdigitated solid supercapacitors in series can light up two red LED lamps.
